# Supplementary material for: Rapid Screening and Quantitative Determination of Illegal Phosphodiesterase Type 5 Inhibitors (PDE-5i) in Herbal Dietary Supplements
Source: J Anal Methods Chem. 2021 May 5;2021:5579500. doi: 10.1155/2021/5579500 (PMC8116155; doi:10.1155/2021/5579500)
Supplement: Supplementary Materials — Supplementary information is provided in word form. [file 5579500.f1.docx]

Supplementary Information

**Journal of Analytical Methods in Chemistry**

**Screening and quantitative determination of phosphodiesterase type 5 inhibitors (PDE-5i) in herbal dietary supplements**

Thi Oanh Nguyen,1,2 Cao-Son Tran,3 Thi Thu Hang Do,3 Nguyen Thi Minh Hoa,3 Quang-Dong Bui,3 Cao-Tien Bui,3 Hong-Ngoc Nguyen,3 Thu-Hien Dang,3 Thi Anh Huong Nguyen,2 Thi Hong Hao Le2,3

1Vietnam Food Administration, Hanoi 10000, Viet Nam.
2University of Science, Vietnam National University, Hanoi 10000, Viet Nam.
3National Institute for Food Control, Hanoi 10000, Viet Nam.

Co-correspondence should be addressed to Thi Hong Hao Le ([lethihonghao@yahoo.com](mailto:lethihonghao@yahoo.com)) and Cao-Son Tran ([sontc@nifc.gov.vn](mailto:sontc@nifc.gov.vn))

**Table of content**

[Table S1: Mass spectrometric information including m/z of precursor and product ions of PDE-5i without standard materials 1](#_Toc68688165)

[Table S2: Linearity, precision, LOD, LOQ, average recovery, and matrix effect of PDE-5i 3](#_Toc68688166)

[Figure S1: Extracted chromatogram of some PDE-5i at a concentration of 30ng/mL 7](#_Toc68688173)

[Figure S2: Extracted chromatogram of some PDE-5i at a concentration of 30 ng/mL (cont) 8](#_Toc68688174)

Table S1: Mass spectrometric information including m/z of precursor and product ions of PDE-5i without standard materials

| No | PDE-5i | Chemical formula | Ion type | Precursor ion (m/z) | Product ion (m/z) |
| --- | --- | --- | --- | --- | --- |
|  | Desmethylthiosildenafil | C21H28N6O3S2 | M+H | 477,17371 | 85,07602; 299,0961; 327,1274; 56,04948; 269,0485; 241,0542; 298,0883; 271,1005; 227,0379 |
|  | Desmethylenetadalafil | C21H19N3O4 | M+H | 378,14483 | 204,0808; 204,0808; 123,0441; 250,0863; 180,0808; 169,076; 234,0913; 130,0651; 256,1081; 238,0863 |
|  | Dinitrodenafil | C17H18N6O6 | M+H | 403,13606 | 283,119; 358,102; 375,1048; 225,0771; 361,1017; 154,0611; 344,099; 344,099; 217,1084; 253,072 |
|  | Gisadenafil | C23H33N7O5S | M+H | 520,23366 | 72,08078; 111,0917; 58,06513; 99,09167; 56,04948; 83,06037; 70,06513; 113,1073; 332,1353 |
|  | N-Butyltadalafil | C25H25N3O4 | M+H | 432,19178 | 135,0441; 204,0808; 169,076; 262,0863; 205,0886; 250,0863; 282,1601; 232,0757; 191,073; 264,1019 |
|  | N-Ethyltadalafil | C23H21N3O4 | M+H | 404,16048 | 135,0441; 204,0808; 169,076; 262,0863; 205,0886; 232,0757; 250,0863; 233,0835; 254,1288; 191,073 |
|  | Propoxyphenyl-thioaildenafil | C24H34N6O3S2 | M+H | 519,22066 | 477,1745; 458,1180; 407,1211; 341,1433; 315,0915; 299,0964; 271,2639; 245,5092; 195,9292; 149,2379; 135,6055 |
|  | Propoxyphenyl-sildenafil | C23H32N6O4S | M+H | 489,22785 | 58,06513; 283,119; 100,0995; 99,09167; 299,1172; 56,04948; 255,124; 225,077; 166,0975; 97,07602 |
|  | Propoxyphenyl-thiosildenafil | C23H32N6O3S2 | M+H | 505,20501 | 58,06513; 299,0961; 99,09167; 100,0995; 313,1118; 56,04948; 70,06513; 315,0917; 329,1067; 271,1012 |
|  | Pyrazole N-demethylsildenafil | C21H28N6O4S | M+H | 461,19655 | 297,1346; 313,1295; 58,06513; 101,1073; 241,1084; 269,1033; 99,09167; 285,0982; 70,06513; 212,0700 |
|  | Thiosildenafil | C22H30N6O3S2 | M+H | 491,18936 | 58,06513; 99,09167; 100,0995; 299,0961; 56,04948; 70,06513; 341,1424; 327,1274; 85,07602; 312,1033 |
|  | Vardenafil N-oxide | C23H32N6O5S | M+H | 505,22277 | 169,0972; 344,1479; 477,1915; 70,06513; 113,1073; 110,06; 377,1278; 123,0917; 98,08385; 56,04948 |
|  | Vardenafil oxopiperazine | C21H26N6O5S | M+H | 475,17582 | 169,0972; 344,1479; 110,06; 299,1139; 123,0917; 316,1166; 68,01309; 82,06513; 55,05423; 95,06037 |
|  | Zaprinast | C13H13N5O2 | M+H | 272,11420 | 120,0444; 202,0611; 230,0673; 92,04948; 157,0396; 104,0495; 55,02907; 65,03858; 159,0553; 132,0444 |

Table S2: Linearity, precision, LOD, LOQ, average recovery, and matrix effect of PDE-5i

| **No** | **PDE-5i** | **Calibration curve** | **Precision (RSD%)** | **LOD (mg/kg)** | **LOQ (mg/kg)** | **Average recovery (%)** | **Matrix effect (ME %)** |
| --- | --- | --- | --- | --- | --- | --- | --- |
| **1** | Mirodenafil | y=6.178*e^6 X - 5.349*e^6 (R^2=0.9998) | 2.46 | 0.4 | 1.32 | 102.31 | 6.67 |
| **2** | Noracetildenafil | y=1.654*e^7 X - 1.578*e^8 (R^2=0.9982) | 3.22 | 0.4 | 1.32 | 102.73 | 5.12 |
| **3** | Desmethyl fondenafil | y=1.049*e^7 X - 6.371*e^8 (R^2=0.9986) | 2.52 | 0.4 | 1.32 | 104.62 | 4.58 |
| **4** | N-Octylnortadalafil | y=1.335*e^6 X - 8.052*e^6 (R^2=0.9998) | 1.12 | 0.4 | 1.32 | 106.18 | 3.15 |
| **5** | Acetylvardenafil | y=2.136*e^6 X - 7.494*e^6 (R^2=0.9998) | 1.68 | 0.4 | 1.32 | 105.05 | 5.57 |
| **6** | Lodenafil carbonate | y=8.638*e^6 X - 9.313*e^6 (R^2=0.9996) | 1.30 | 0.4 | 1.32 | 101.81 | 5.08 |
| **7** | Hydroxyacetildenafil | y=2.289*e^6 X - 1.166*e^6 (R^2=0.9996) | 1.73 | 0.4 | 1.32 | 101.74 | 6.89 |
| **8** | Carbodenafil | y=5.815*e^6 X - 7.817*e^6 (R^2=0.9978) | 2.33 | 0.4 | 1.32 | 103.36 | 4.70 |
| **9** | Acetildenafil | y=6.302*e^6 X - 2.166*e^7 (R^2=0.9995) | 2.76 | 0.4 | 1.32 | 102.77 | 5.59 |
| **10** | Descarbonsildenafil | y=2.345*e^6 X - 1.664*e^7 (R^2=0.9975) | 1.34 | 0.4 | 1.32 | 103.50 | 7.24 |
| **11** | Piperiacetildenafil | y=1.262*e^6 X - 8.601*e^6 (R^2=1.0000) | 1.45 | 0.4 | 1.32 | 99.91 | 4.51 |
| **12** | Dimethylacetildenafil | y=4.121*e^6 X - 2.660*e^7 (R^2=0.9998) | 4.51 | 0.4 | 1.32 | 102.28 | 4.00 |
| **13** | Hydroxyvardenafil | y=2.709*e^6 X - 8.784*e^6 (R^2=0.9986) | 2.21 | 0.4 | 1.32 | 100.58 | 5.76 |
| **14** | N-Desethylvardenafil | y=5.103*e^5 X - 4.694*e^6 (R^2=0.9991) | 1.47 | 0.4 | 1.32 | 97.64 | 5.92 |
| **15** | Piperazonifil | y=5.670*e^4 X - 8.710*e^4 (R^2=0.9983) | 1.45 | 0.4 | 1.32 | 98.16 | 7.12 |
| **16** | Vardenafil | y=1.064*e^5 X - 1.202*e^6 (R^2=1.0000) | 3.59 | 0.4 | 1.32 | 100.02 | 6.46 |
| **17** | Avanafil | y=3.709*e^4 X - 4.588*e^5 (R^2=0.9999) | 1.72 | 0.4 | 1.32 | 100.47 | 6.67 |
| **18** | Isosildenafil | y=6.451*e^6 X + 1.886*e^7 (R^2=0.9981) | 2.55 | 0.4 | 1.32 | 102.34 | 5.05 |
| **19** | Hydroxyhomosildenafil | y=1.076*e^6 X - 4.591*e^6 (R^2=0.9992) | 2.27 | 0.4 | 1.32 | 98.51 | 4.94 |
| **20** | N-Desmethylsildenafil | y=3.551*e^5 X - 3.350*e^6 (R^2=0.9976) | 4.48 | 0.4 | 1.32 | 101.59 | 4.02 |
| **21** | Sildenafil | y=9.580*e^4 X - 1.023*e^6 (R^2=0.9964) | 2.73 | 0.4 | 1.32 | 102.48 | 4.30 |
| **22** | Homosildenafil | y=1.154*e^6 X - 1.008*e^7 (R^2=0.9976) | 1.67 | 0.4 | 1.32 | 102.53 | 4.21 |
| **23** | Acetaminotadalafil | y=1.838*e^6 X - 1.181*e^7 (R^2=0.9995) | 1.82 | 0.4 | 1.32 | 102.07 | 5.88 |
| **24** | Aminotadalafil | y=2.201*e^6 X - 2.879*e^7 (R^2=1.0000) | 2.77 | 0.4 | 1.32 | 98.55 | 3.15 |
| **25** | Sildenafil N-oxide | y=6.314*e^6 X - 6.025*e^7 (R^2=0.9996) | 2.05 | 0.4 | 1.32 | 98.03 | 3.48 |
| **26** | Cyclopentylnafil | y=2.003*e^6 X - 1.611*e^7 (R^2=0.9997) | 1.97 | 0.4 | 1.32 | 101.99 | 5.90 |
| **27** | Dimethylsildenafil | y=1.930*e^6 X - 7.092*e^6 (R^2=0.9940) | 2.84 | 0.4 | 1.32 | 102.31 | 4.56 |
| **28** | Nortadalafil | y=4.368*e^4 X - 6.043*e^5 (R^2=0.9993) | 2.18 | 0.4 | 1.32 | 104.51 | 5.78 |
| **29** | Udenafil | y=1.068*e^7 X - 3.943*e^7 (R^2=0.9949) | 1.95 | 0.4 | 1.32 | 104.87 | 7.57 |
| **30** | Benzamidenafil | y=1.068*e^7 X - 3.943*e^7 (R^2=0.9949) | 1.34 | 0.4 | 1.32 | 98.94 | 5.92 |
| **31** | Norneovardenafil | y=2.566*e^5 X - 3.393*e^6 (R^2=0.9991) | 2.37 | 0.4 | 1.32 | 106.24 | 2.63 |
| **32** | Propoxyphenyl-homohydroxysildenafil | y=5.827*e^5 X - 5.275*e^6 (R^2=1.0000) | 2.16 | 0.4 | 1.32 | 108.63 | 3.95 |
| **33** | O-desethyl-o-propyl sildenafil | y=4.917*e^6 X - 8.105*e^7 (R^2=0.9913) | 2.93 | 0.4 | 1.32 | 106.67 | 3.06 |
| **34** | 2-Hydroxypropyl nortadalafil | y=1.702*e^6 X - 1.977*e^7 (R^2=0.9998) | 2.00 | 0.4 | 1.32 | 107.25 | 4.07 |
| **35** | Propoxyphenyl aildenafil | y=1.475*e^6 X - 1.663*e^7 (R^2=0.9999) | 2.38 | 0.4 | 1.32 | 104.76 | 6.49 |
| **36** | Acetil acid | y=8.306*e^6 X - 1.602*e^7 (R^2=0.9989) | 3.08 | 0.4 | 1.32 | 108.38 | 5.48 |
| **37** | Tadalafil | y=3.561*e^6 X - 3.475*e^7 (R^2=1.0000) | 1.92 | 0.4 | 1.32 | 102.85 | 3.15 |
| **38** | Depiperazino-thiosildenafil | y=2.259*e^5 X - 2.981*e^6 (R^2=0.9987) | 1.70 | 0.4 | 1.32 | 100.18 | 3.41 |
| **39** | Mutaprodenafil | y=2.012*e^5 X - 1.398*e^6 (R^2=0.9997) | 2.45 | 0.4 | 1.32 | 99.10 | 6.09 |
| **40** | Gendenafil | y=2.515*e^6 X - 1.670*e^7 (R^2=0.9975) | 2.52 | 0.4 | 1.32 | 100.06 | 5.19 |
| **41** | Hydroxychlorodenafil | y=1.343*e^6 X - 8.663*e^6 (R^2=1.0000) | 3.03 | 0.4 | 1.32 | 99.67 | 3.45 |
| **42** | Hydroxythiovardenafil | y=4.211*e^6 X - 2.580*e^7 (R^2=0.9998) | 2.75 | 0.4 | 1.32 | 101.99 | 3.41 |
| **43** | Chloropretadalafil | y=2.755*e^6 X - 8.776*e^6 (R^2=0.9986) | 2.84 | 0.4 | 1.32 | 92.02 | 4.85 |
| **44** | Chlorodenafil | y=5.535*e^5 X - 4.205*e^6 (R^2=0.9991) | 2.15 | 0.4 | 1.32 | 94.91 | 4.04 |
| **45** | Benzylsildenafil | y=5.220*e^4 X - 8.161*e^4 (R^2=0.9983) | 2.10 | 0.4 | 1.32 | 95.79 | 5.99 |
| **46** | Nitrodenafil | y=1.052*e^5 X - 1.212*e^6 (R^2=1.0000) | 1.71 | 0.4 | 1.32 | 97.36 | 5.33 |
| **47** | Pseudovardenafil | y=2.030*e^6 X - 6.955*e^6 (R^2=0.9940) | 1.83 | 0.4 | 1.32 | 94.92 | 6.05 |
| **48** | Imidazosagatriazinone | y=4.555*e^4 X - 6.122*e^5 (R^2=0.9993) | 1.79 | 0.4 | 1.32 | 92.43 | 6.42 |
| **49** | Propoxyphenylthio-hydroxyhomosildenafil | y=1.058*e^7 X - 4.043*e^7 (R^2=0.9949) | 2.50 | 0.4 | 1.32 | 97.89 | 3.92 |
| **50** | Thiohomosildenafil | y=1.078*e^7 X - 3.953*e^7 (R^2=0.9949) | 1.34 | 0.4 | 1.32 | 100.23 | 4.28 |
| **51** | Hydroxythio-homosildenafil | y=2.766*e^5 X - 3.287*e^6 (R^2=0.9991) | 1.48 | 0.4 | 1.32 | 102.36 | 6.51 |
| **52** | Norneosildenafil | y=6.027*e^5 X - 5.185*e^6 (R^2=1.0000) | 2.51 | 0.4 | 1.32 | 102.87 | 4.82 |
| **53** | Thiosildenafil | y=4.922*e^6 X - 8.088*e^7 (R^2=0.9913) | 1.94 | 0.4 | 1.32 | 102.96 | 4.63 |


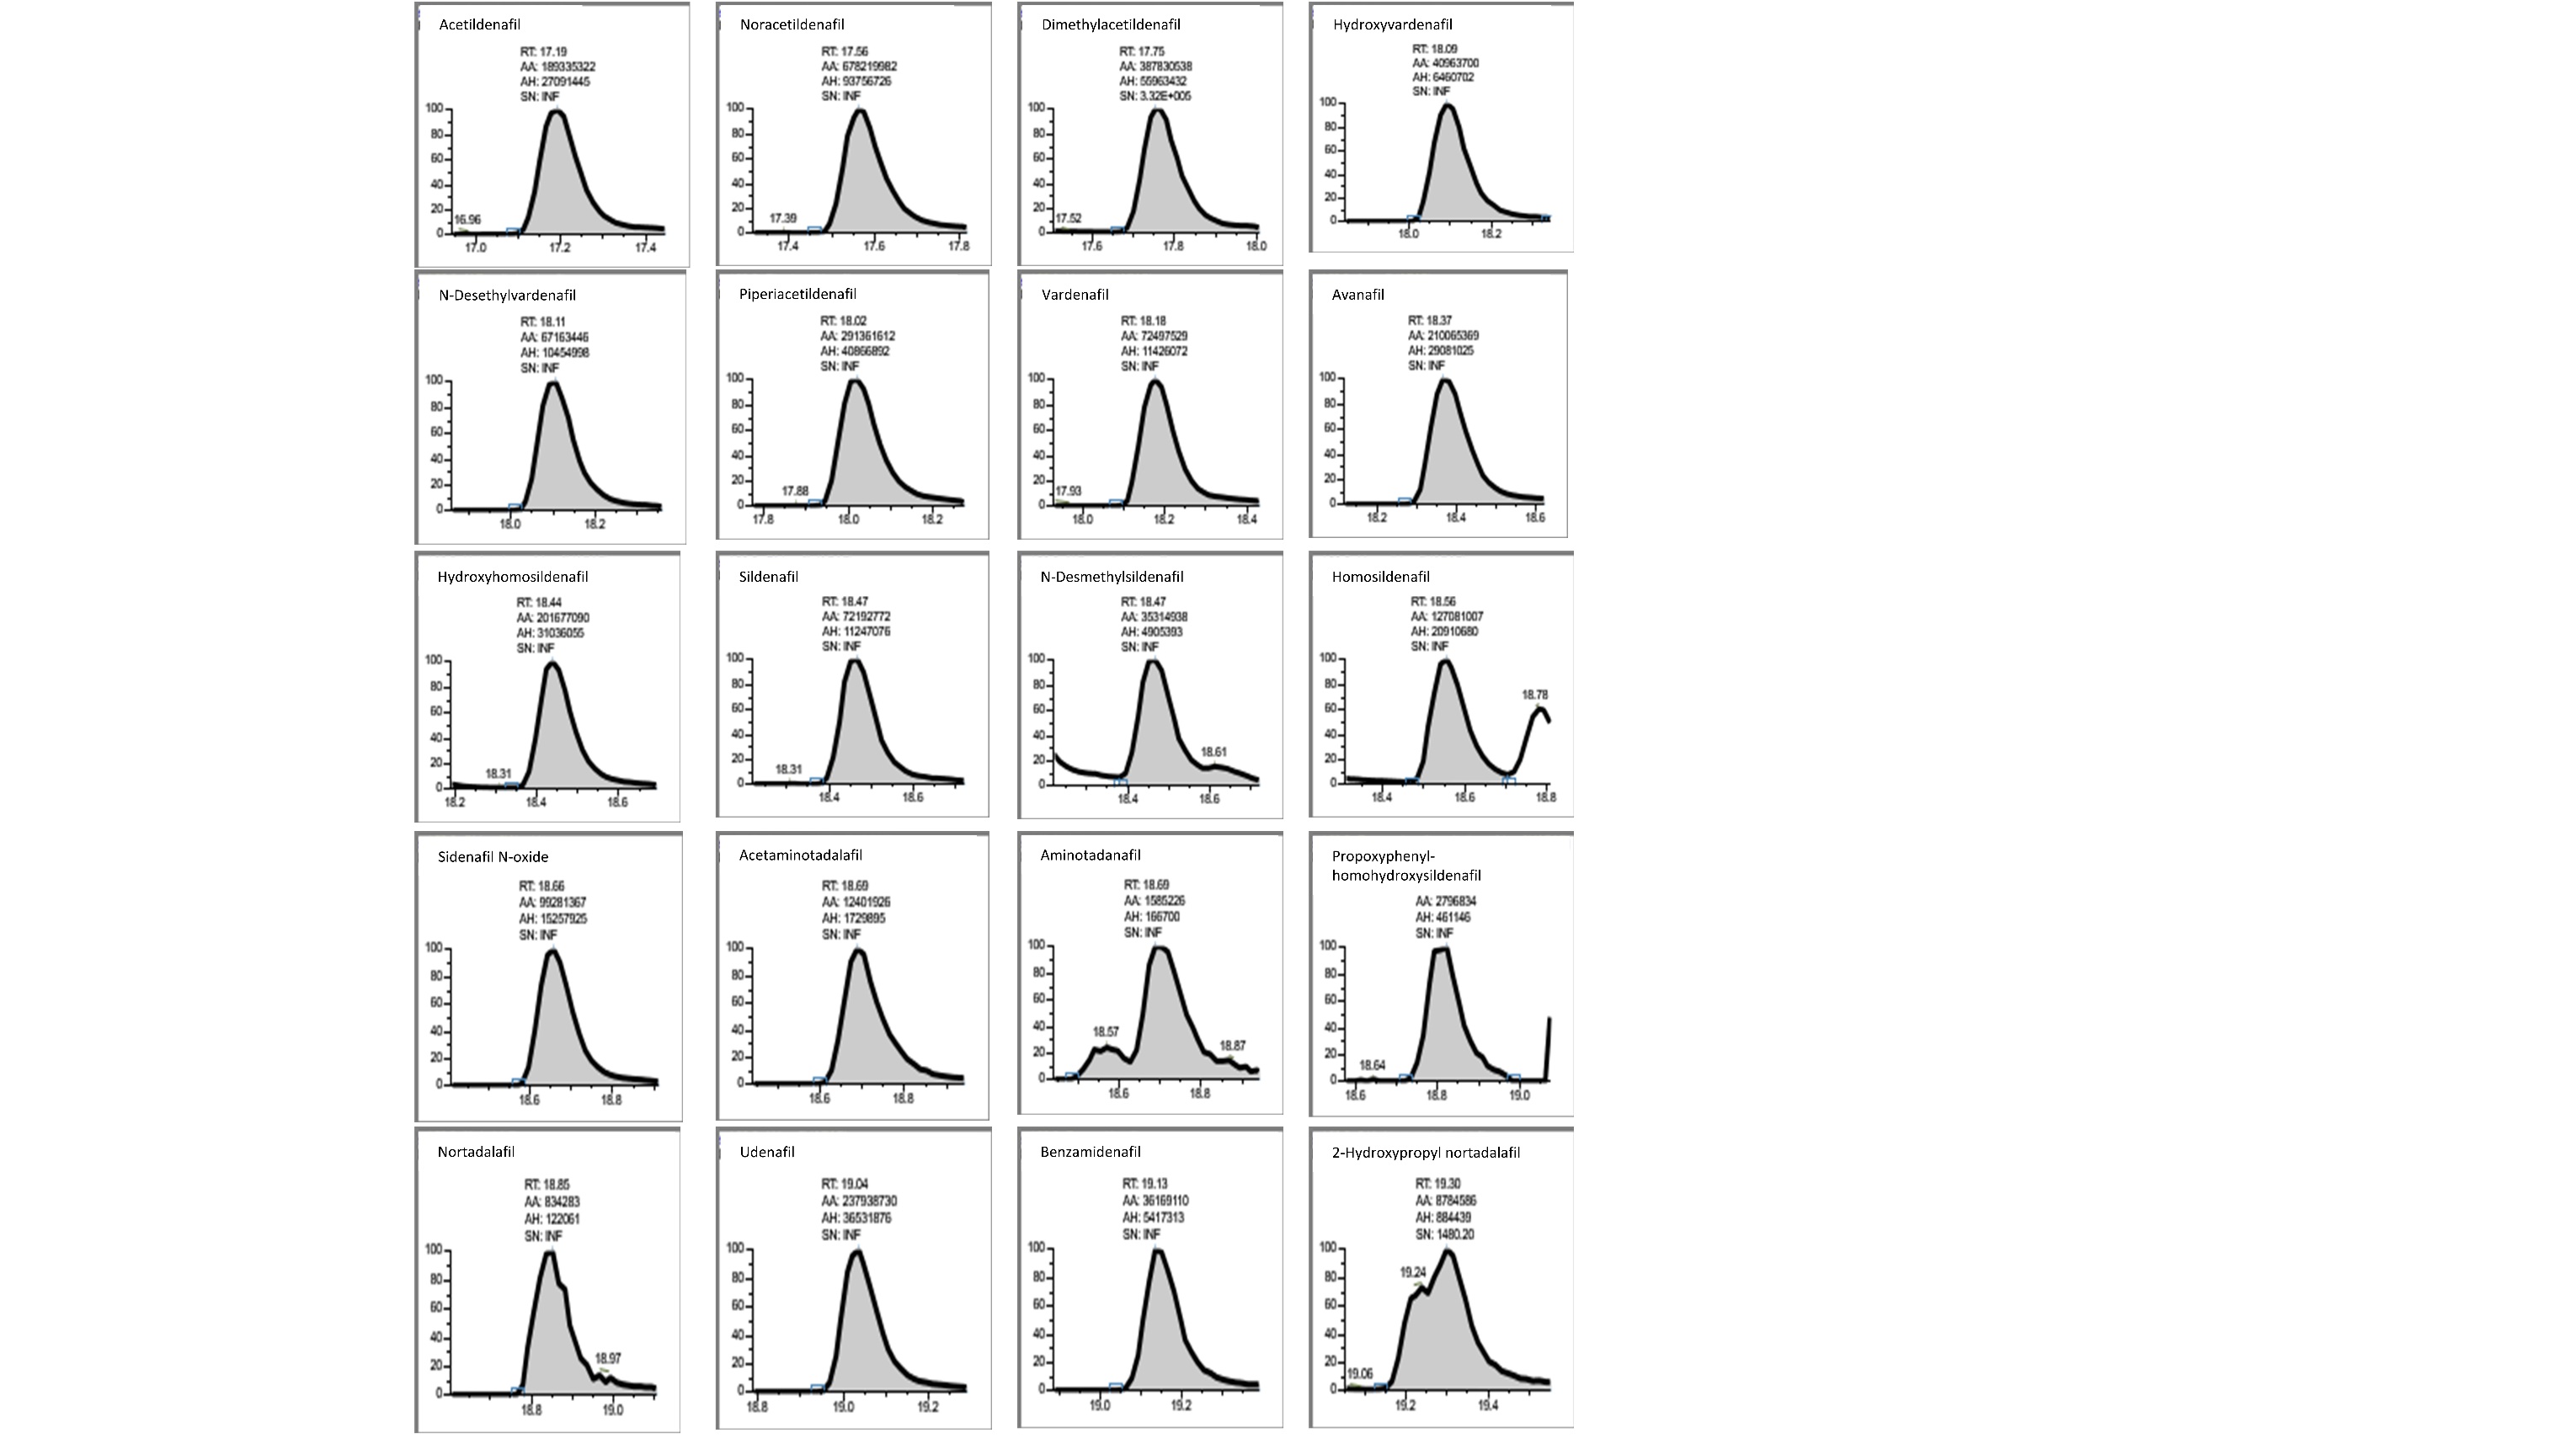


Figure S1: Extracted chromatogram of some PDE-5i at a concentration of 30ng/mL


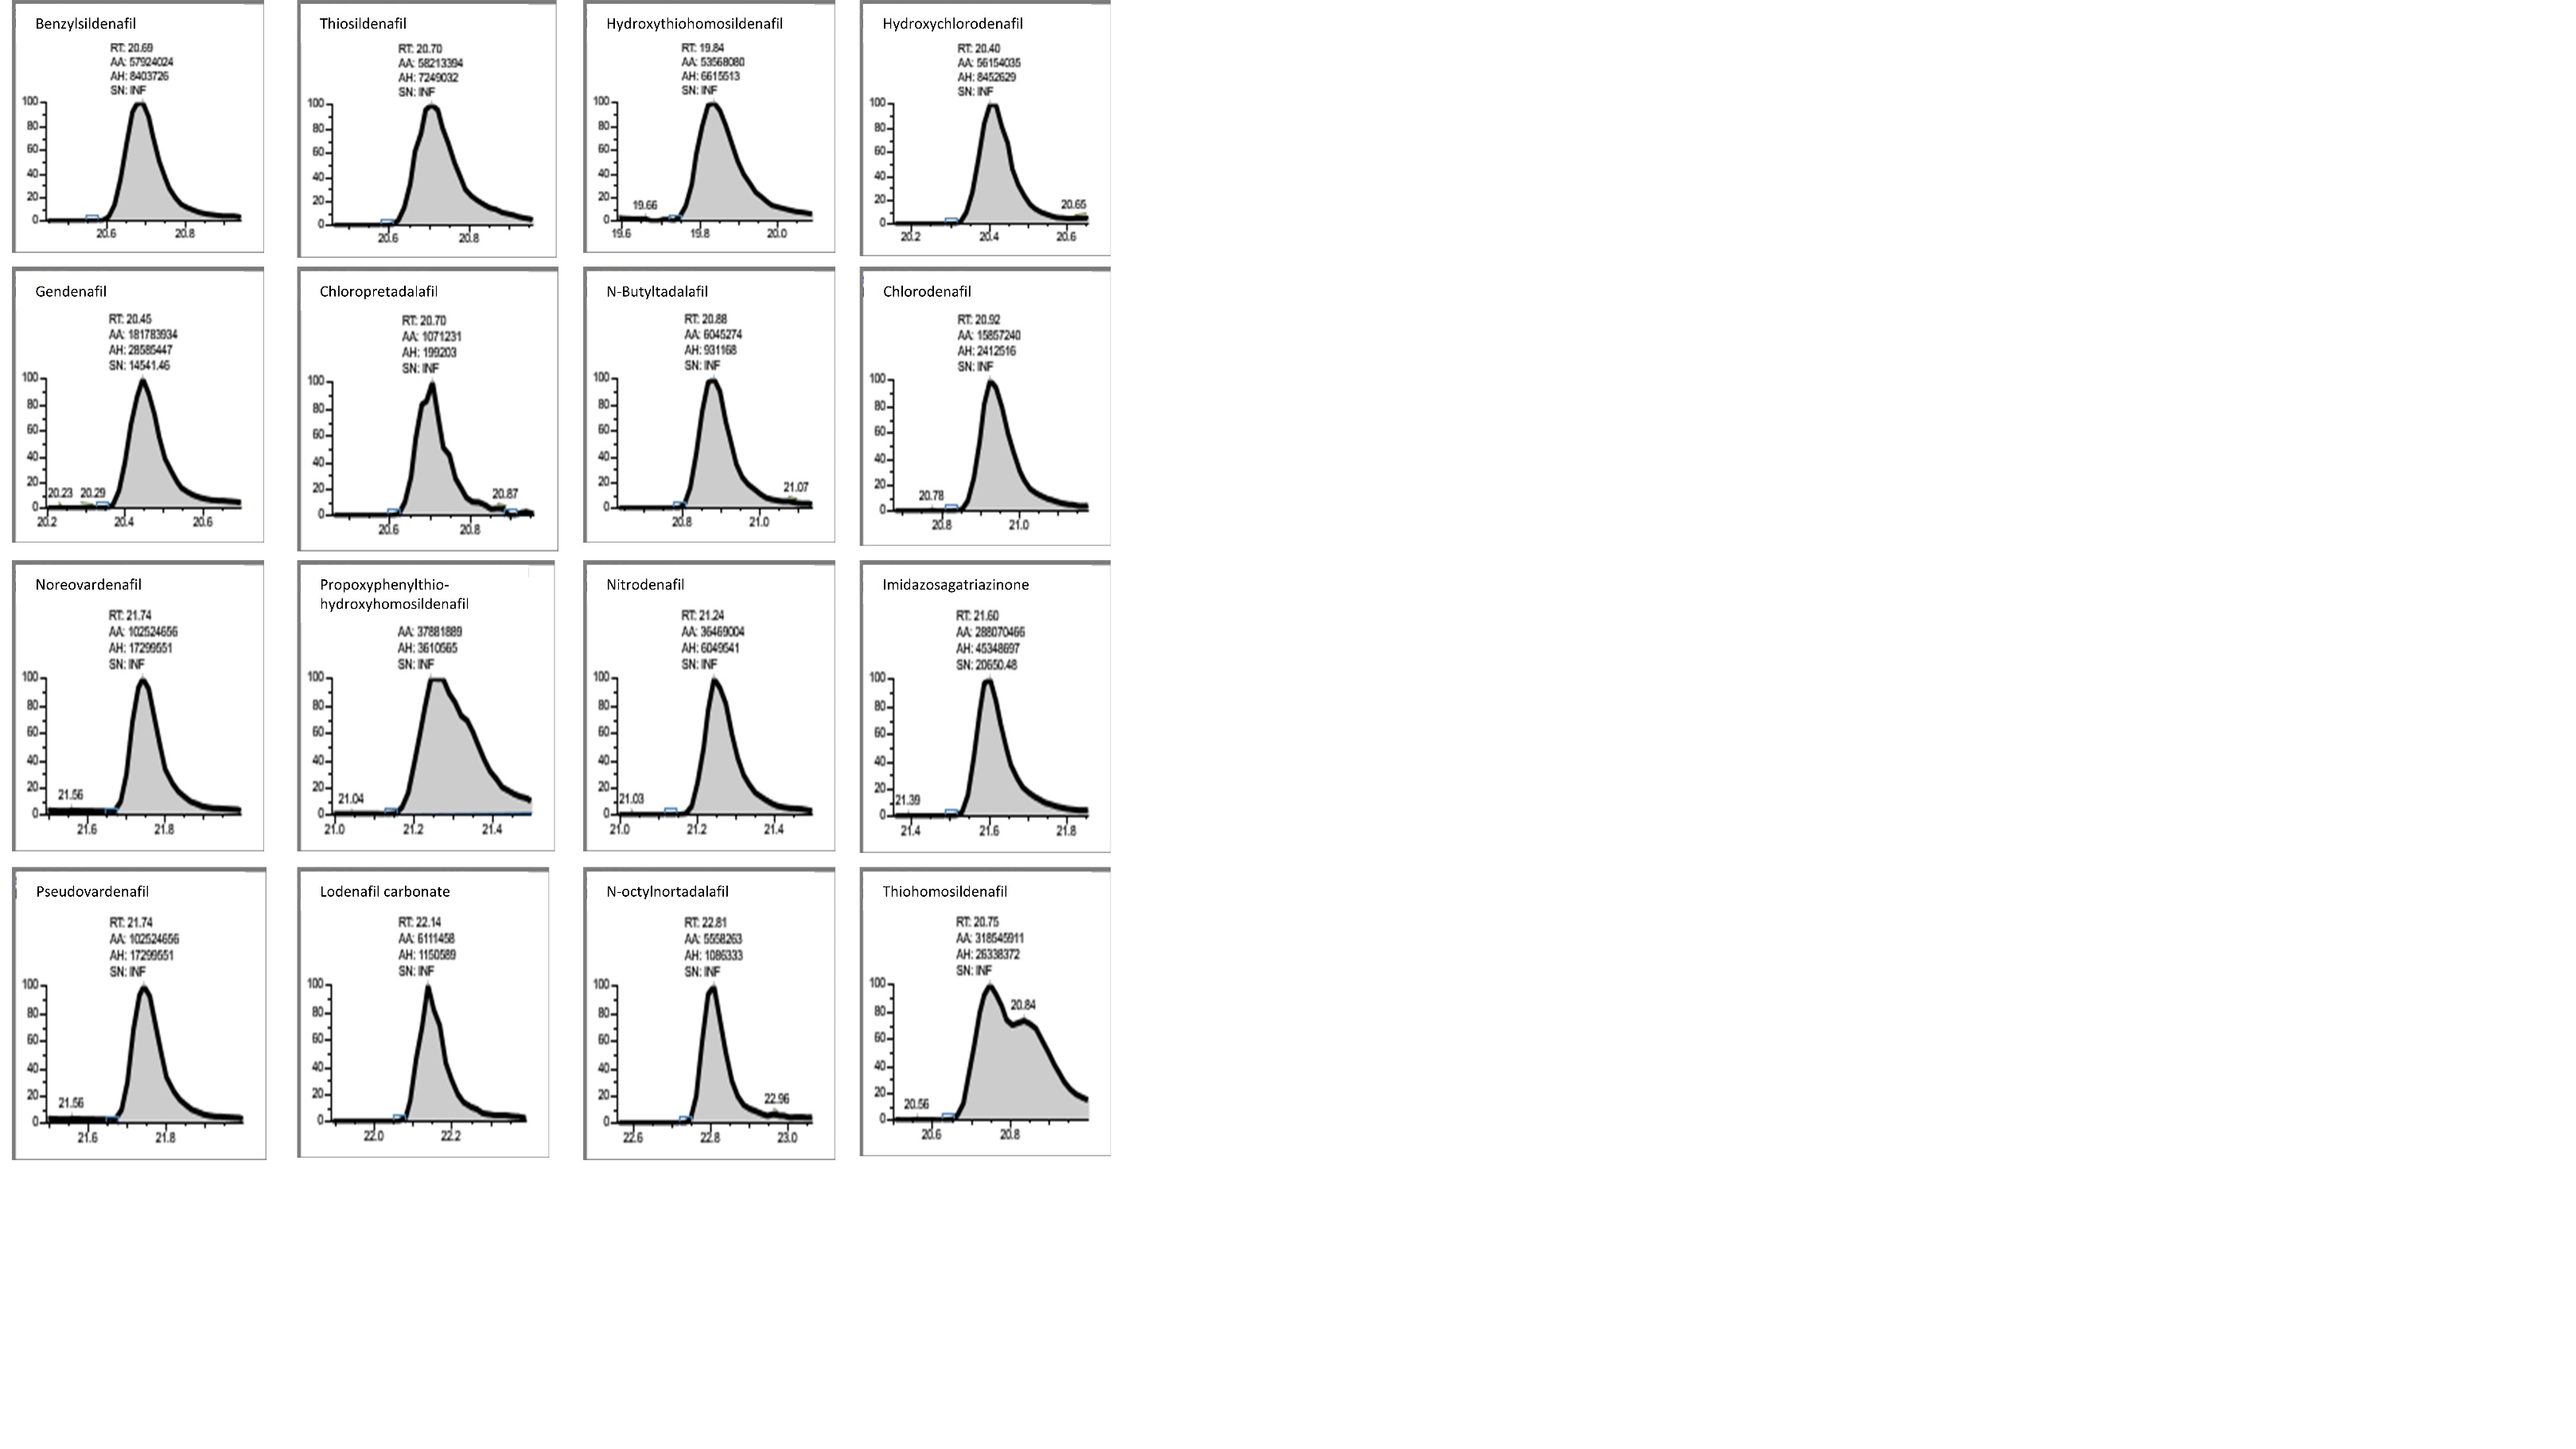


Figure S2: Extracted chromatogram of some PDE-5i at a concentration of 30 ng/mL (cont)
